# Supplementary material for: Demystifying Case Management in Aotearoa New Zealand: A Scoping and Mapping Review
Source: MDPI journal article supplement (doi:10.3390/ijerph20010784), 2022-12-31
Supplement: s1 [file s1]

**Table S1.** Summary of data sources for each role

| No.   | Role                                                                               | Health databases |         |        | Grey literature     |            |                            |                                       | Interviews |        |
|-------|------------------------------------------------------------------------------------|------------------|---------|--------|---------------------|------------|----------------------------|---------------------------------------|------------|--------|
|       |                                                                                    | Article          | Chapter | Theses | Reports Evaluations | Job Advert | Māori and Pacific websites | Other: Videos, presentation magazines | Interview  | Ecomap |
| 1     | Whānau Ora Navigator                                                               | √√√√√            | √       | √      | √√√√√√√√√√          | √          | √√√√√√√√√√√√√√√√           | √                                     |            |        |
| 2     | Kai Manaaki (KM)                                                                   | √√√√             |         |        | √√                  |            |                            | √√√                                   |            |        |
| 3     | Māori Cancer Coordinator                                                           | √                |         | √√     |                     |            | √√                         |                                       |            |        |
| 4     | Pacific Navigator                                                                  |                  |         |        | √                   |            |                            |                                       | √          | √      |
| 5     | Partnership Community Worker (PCW)                                                 | √                |         | √      |                     |            |                            | √√                                    |            |        |
| 6     | Case Manager (Private Insurance)                                                   |                  |         |        | √                   | √√√√       |                            |                                       | √          | √      |
| 7     | ACC Recovery Coordinator                                                           |                  |         |        |                     | √          | √√                         |                                       | √          | √      |
| 8     | ACC Recovery Partner                                                               | √√               |         |        |                     |            |                            |                                       | √          | √      |
| 9     | Practice Nurse Case Manager                                                        | √√√√√√√√<br>√    |         |        | √√                  |            | √√                         |                                       | √          | √      |
| 10,11 | Behavioural Support Practitioner (Health Coach or Health Improvement Practitioner) |                  |         |        | √                   | √          |                            | √√                                    | √          | √√     |
| 12    | Needs Assessment Service Coordinator (NASC)                                        |                  |         |        | √                   | √√         | √√√√√                      | √                                     | √√         | √√     |
| 13    | Local Area Coordinator (LAC)                                                       |                  |         |        | √√                  |            |                            | √                                     |            |        |
| 14    | Kaitūhuno (Connector)                                                              |                  |         |        | √                   |            |                            | √√                                    |            |        |
| 15    | Care Manager Older Adults                                                          | √√√√√            |         |        |                     | √√√        |                            |                                       | √          | √      |
| 16    | Cancer Nurse Coordinator                                                           | √√               |         |        | √                   |            |                            |                                       |            |        |
| 17    | Case Loading Midwives                                                              | √                |         | √      |                     |            |                            |                                       | √√         |        |
| 18    | Key Worker: Mental Health                                                          | √                |         |        |                     | √√√√√      |                            |                                       | √√         |        |
